# Supplementary material for: Efficacy of mobile application interventions for the treatment of post-traumatic stress disorder: A systematic review
Source: PubMed Central journal article supplement — Digit Health. 2019 Apr 12;5:2055207619842986. doi: 10.1177/2055207619842986 (PMC6463234; doi:10.1177/2055207619842986), 2019-04-12
Supplement: Supplemental_Material.pdf [file Supplemental_Material.pdf]

Supplementary Table 1.

|                 | Random sequence generation (selection bias) | Allocation concealment (selection bias) | Blinding of outcome assessment (detection bias) | Selective reporting (reporting bias) |
|-----------------|---------------------------------------------|-----------------------------------------|-------------------------------------------------|--------------------------------------|
| Kahn, 2016      | H                                           | L                                       | U                                               | L                                    |
| Kuhn, 2017      | L                                           | U                                       | U                                               | L                                    |
| Miner, 2016     | H                                           | U                                       | U                                               | H                                    |
| Possemato, 2016 | H                                           | H                                       | H                                               | H                                    |
| Roy, 2017       | L                                           | H                                       | U                                               | L                                    |

L = low risk of bias, U = unclear risk of bias, H = high risk of bias.
